# Supplementary material for: Leg ischaemia management collaboration (LIMb): study protocol for a prospective cohort study at a single UK centre
Source: PubMed Central journal article supplement — BMJ Open. 2019 Sep 3;9(9):e031257. doi: 10.1136/bmjopen-2019-031257 (PMC6731919; doi:10.1136/bmjopen-2019-031257), 2019-09-03
Supplement: bmjopen-2019-031257supp001.pdf [file bmjopen-2019-031257supp001.pdf]

**Expected adverse events and serious adverse events****Cardiac**

Angina  
Ankle swelling and  
peripheral oedema  
Arrhythmias  
Cardiac arrest  
Cardiac failure  
Myocardial infarction  
Palpitations  
Poor exercise tolerance  
Shortness of breath  
Tiredness and exhaustion

**Respiratory**

Chest infection  
Cough  
Exacerbation of COPD  
Pneumonia  
Pulmonary embolus  
Respiratory failure

**Leg problems**

Bruising  
Cellulitis  
Debridement of leg/foot  
wound  
DVT  
Foot amputation  
Haematoma  
Lymph leak  
Minor amputation of toes  
Osteomyelitis of  
leg/foot/toes  
Pain  
Phlebitis  
Wound breakdown  
Wound infection

**Diabetes**

Drug reactions  
Hyperglycaemia  
Hypoglycaemia  
Infections  
Injections site problems  
Neuropathy

**General**

Abdominal pain  
Anxiety  
Arm / hand pain  
Backache  
Breast lumps  
Breast pain  
Cellulitis  
Constipation  
Delirium  
Depression  
Diarrhoea  
Earache  
Falls  
Fractures  
Gastrointestinal bleeding  
Gastro-oesophageal  
reflux disease  
Gynaecological bleeding  
Head injury  
Headache  
Indigestion  
Influenza  
Intra-abdominal  
infections and sepsis  
Jaundice  
Joint inflammation  
Joint pain  
Leg/foot pain  
Liver disease  
Malaise  
Malignancy  
Neck and spine pain  
Neck pain  
Necrotising fasciitis  
Nose bleeds  
Osteoarthritis  
Other forms of arthritis  
Parkinson disease  
Pelvic pain  
Peptic ulcer disease  
Piles and perianal disease  
Prostatism  
Psychiatric illness

Rectal bleeding  
Renal impairment  
Sciatica  
Skin lesions  
Skin rashes  
Soft tissue inflammation  
Stress  
Stroke  
Transient ischaemic  
attack  
Toothache  
Urinary retention  
Urinary tract infection  
Vomiting
